# Supplementary material for: A novel purification method for fluoride or chloride molten salts based on the redox of hydrogen on a nickel electrode
Source: Royal Society of Chemistry journal article supplement (doi:10.1039/d1ra05794d), 2021-01-01
Supplement: d1ra05794d1.pdf [file d1ra05794d1.pdf]

### Supporting Information

1. Potential difference of the H<sup>+</sup>/H<sub>2</sub> and Ni<sup>2+</sup>/Ni electrode evaluated by thermodynamic calculation.

The standard potential difference between H<sup>+</sup>/H<sub>2</sub> and Ni<sup>2+</sup>/Ni at 400-800 °C was calculated by the standard free energy  $\Delta G$  of the following two cell reactions:

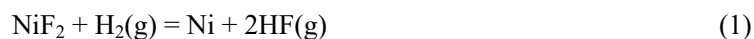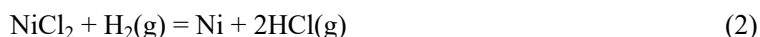

Where the  $\Delta G = -nF\Delta E$ ,  $\Delta E$  is the standard potential difference between H<sup>+</sup>/H<sub>2</sub> and Ni<sup>2+</sup>/Ni,  $n$  is the number of the transferred electron,  $F$  is the Faraday constant. The calculated  $\Delta E$  were list in the following Table S1.

**Table S1** The standard potential difference between H<sup>+</sup>/H<sub>2</sub> and Ni<sup>2+</sup>/Ni at 400-800 °C

| Temperatur<br>e<br>(°C) | $\Delta G$ of eq (1)<br>(KJ mol <sup>-1</sup> ) | $\Delta G$ of eq (2)<br>(KJ mol <sup>-1</sup> ) | $\Delta E$ in fluoride<br>system (V) | $\Delta E$ in chloride<br>system (V) |
|-------------------------|-------------------------------------------------|-------------------------------------------------|--------------------------------------|--------------------------------------|
| 400                     | -4.037                                          | 5.754                                           | -0.021                               | 0.030                                |
| 450                     | -12.287                                         | -2.298                                          | -0.064                               | -0.012                               |
| 500                     | -20.485                                         | -10.285                                         | -0.106                               | -0.053                               |
| 550                     | -28.632                                         | -18.209                                         | -0.148                               | -0.094                               |
| 600                     | -36.728                                         | -26.075                                         | -0.190                               | -0.135                               |
| 650                     | -44.776                                         | -33.886                                         | -0.232                               | -0.176                               |
| 700                     | -52.777                                         | -41.645                                         | -0.273                               | -0.216                               |
| 750                     | -60.732                                         | -49.355                                         | -0.315                               | -0.256                               |
| 800                     | -68.642                                         | -57.019                                         | -0.356                               | -0.295                               |

2. The H<sup>+</sup>/H<sub>2</sub>, Ni electrode employed in this study.

The photo of the H<sup>+</sup>/H<sub>2</sub>, Ni was shown in Fig. 1S. The H<sup>+</sup>/H<sub>2</sub>, Ni electrode was made from a nickel pipe ( $\phi 6 \times 3.5$ ) and a nickel foil belt (width 8mm thickness 0.05mm) which were bound together by a nickel wire ( $\phi 1\text{mm}$ ). The apparent working area of the H<sup>+</sup>/H<sub>2</sub>, Ni electrode was evaluated by the total surface of the nickel material that immersed into the molten salts.

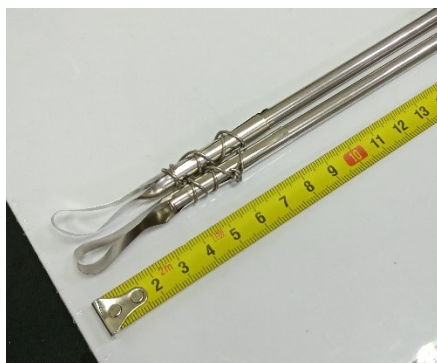

**Fig. 1S** The photo of the H<sup>+</sup>/H<sub>2</sub>, Ni made from nickel pipe and nickel foil employed in this study

3. The  $\text{Ni}^{2+}/\text{Ni}$  reference electrodes employed in this work.

A  $\text{NiCl}_2/\text{Ni}$  reference electrode (Fig.2S(a) 20wt%  $\text{NiCl}_2$  mixed with 80wt% MNKC salts and sealed in a Pyrex glass tube) and a  $\text{NiF}_2/\text{Ni}$  reference electrode (Fig.2S(b) 20wt%  $\text{NiF}_2$  mixed with 80wt% FLiNaK salts and sealed in a Hot-pressed Boron Nitride (HBN) tube) was employed for the electrochemical investigation of  $\text{H}^+/\text{H}_2$ , Ni electrode in MNKC and FLiNaK melts, respectively. The potential shift of the  $\text{NiCl}_2/\text{Ni}$  and  $\text{NiF}_2/\text{Ni}$  reference electrode in MNKC or FLiNaK melts is about -7 and -5 mV/h at  $600^\circ\text{C}$ , respectively. To avoid the importing of trace oxygen from Pyrex or HBN into the purified molten salts, a 99.95% Pt wire ( $\phi 1\text{mm}$ ) was used as pseudo reference electrode in both chloride and fluoride molten salt system for voltammetry studies.

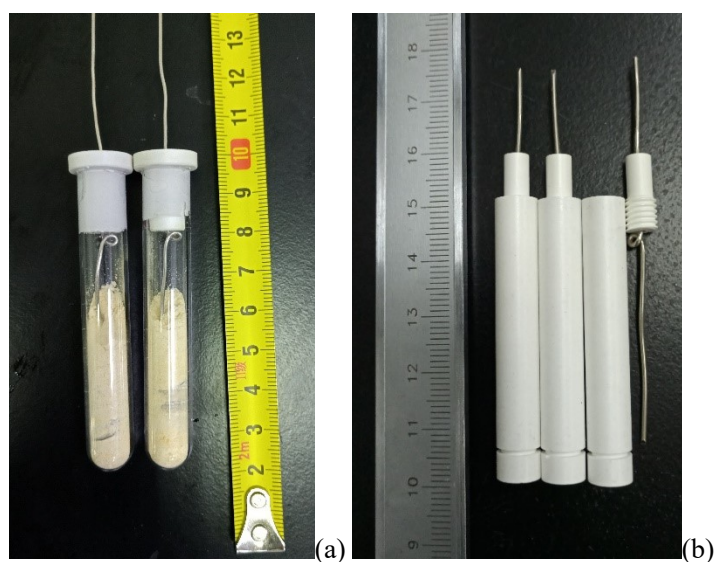

**Fig. 2S** The photos of the  $\text{Ni}^{2+}/\text{Ni}$  reference electrode. (a)  $\text{NiCl}_2/\text{Ni}$  reference electrode used in MNKC melts, 20wt%  $\text{NiCl}_2$ -80wt% MNKC filled in a Pyrex glass tube. (b)  $\text{NiF}_2/\text{Ni}$  reference electrode used in FLiNaK melts, 20wt%  $\text{NiF}_2$ -80wt% FLiNaK filled in a HBN tube.

4. The stability of the polarization potential of the  $\text{H}^+/\text{H}_2$ , Ni electrode under a consistent current. A consistent current electrolysis was performed between the  $\text{H}^+/\text{H}_2$ , Ni electrode and the nickel vessel (counter electrode) for 4h. The potential of the  $\text{H}^+/\text{H}_2$ , Ni electrode was recorded vs the  $\text{NiCl}_2/\text{Ni}$  reference electrode. Results in Fig.3S indicated that the polarization potential of the  $\text{H}^+/\text{H}_2$ , Ni electrode under a 20mA consistent current kept at a relative stable level upon the consideration of the potential shift of the  $\text{NiCl}_2/\text{Ni}$  reference electrode.

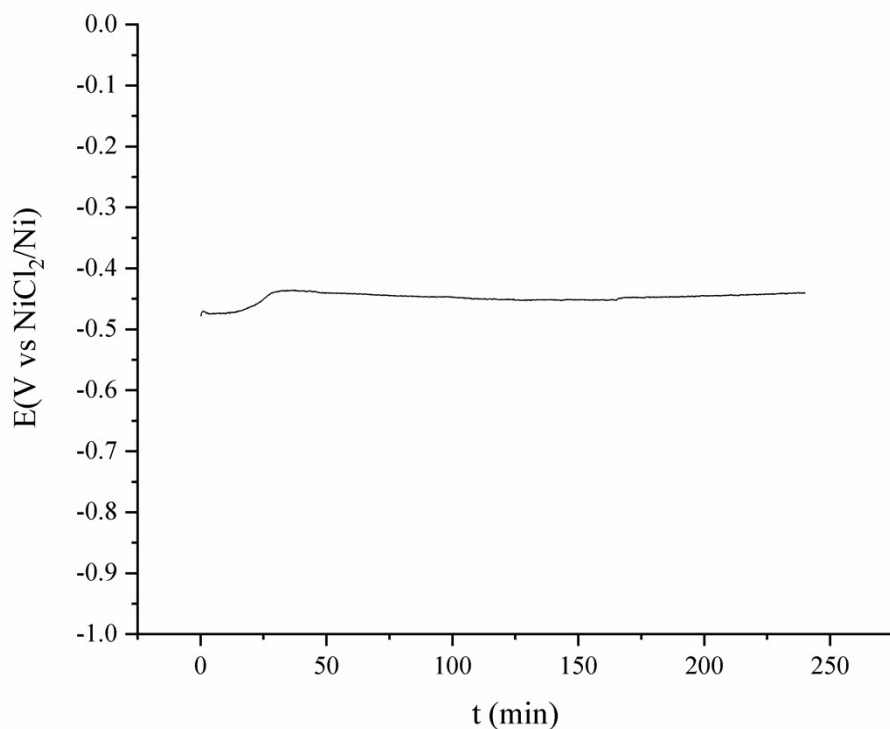

**Fig. 3S** Potential variation of the  $H^+/H_2$ , Ni electrode in a consistent current electrolysis in the MNKC melts at  $600^\circ\text{C}$ .  $H_2$  flow rate  $150\text{ cm}^3/\text{min}$ . Current  $20\text{ mA}$ .

5. Thermodynamic evaluation for the stability of  $\text{CrCl}_2$  or  $\text{CrCl}_3$  with  $H_2$  at  $400\text{-}800^\circ\text{C}$ .

The thermodynamic calculations of the reaction of  $H_2$  with  $\text{CrCl}_2$  or  $\text{CrCl}_3$  at  $400\text{-}800^\circ\text{C}$  was performed and the plots of  $\Delta G$  vs temperatures were given in Fig. 3S. Results indicated that the  $\text{Cr}^{3+}$  could be reduced to  $\text{Cr}^{2+}$  by  $H_2$  gas at  $500\text{-}800^\circ\text{C}$ . While the  $\text{Cr}^{2+}$  will be stable in the molten salts with the existence of  $H_2$  at the experimental temperature range.

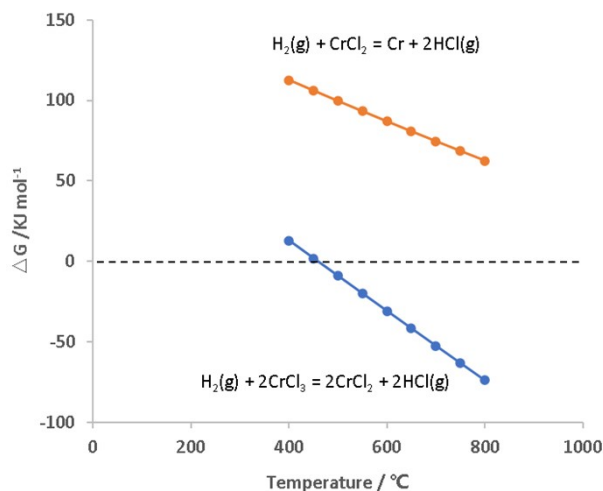

**Fig. 4S** The thermodynamic calculations of the reaction of  $H_2$  with  $\text{CrCl}_2$  or  $\text{CrCl}_3$  at  $400\text{-}800^\circ\text{C}$
